# Supplementary material for: Highly efficient and stable blue organic light-emitting diodes through the selective quenching of long-living triplet exciton of a thermally activated delayed fluorescence emitter
Source: Royal Society of Chemistry journal article supplement (doi:10.1039/d1tc01458g), 2021-01-01
Supplement: d1tc01458g1.pdf [file d1tc01458g1.pdf]

## Supporting Information

### **Highly Efficient and Stable Blue Organic Light-Emitting Diodes through Selective Quenching of Long-Living Triplet Exciton of Thermally Activated Delayed Fluorescence Emitter**

Won Jae Chung and Jun Yeob Lee\*

## Supplementary figures

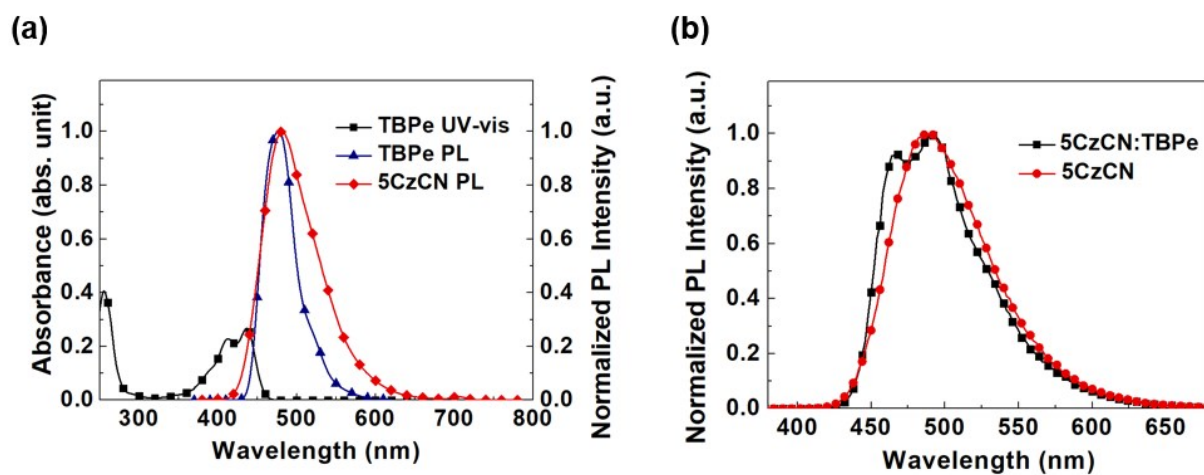

**Figure S1.** (a) UV-vis absorption spectra and normalized PL spectra of TBPe and 5CzCN ( $1.0 \times 10^{-5}$  M THF solution). (b) Normalized PL spectra of 5CzCN film, 5CzCN:TBPe co-doped film (in DPEPO film doped with 20 wt% or 20 wt%:1 wt%).

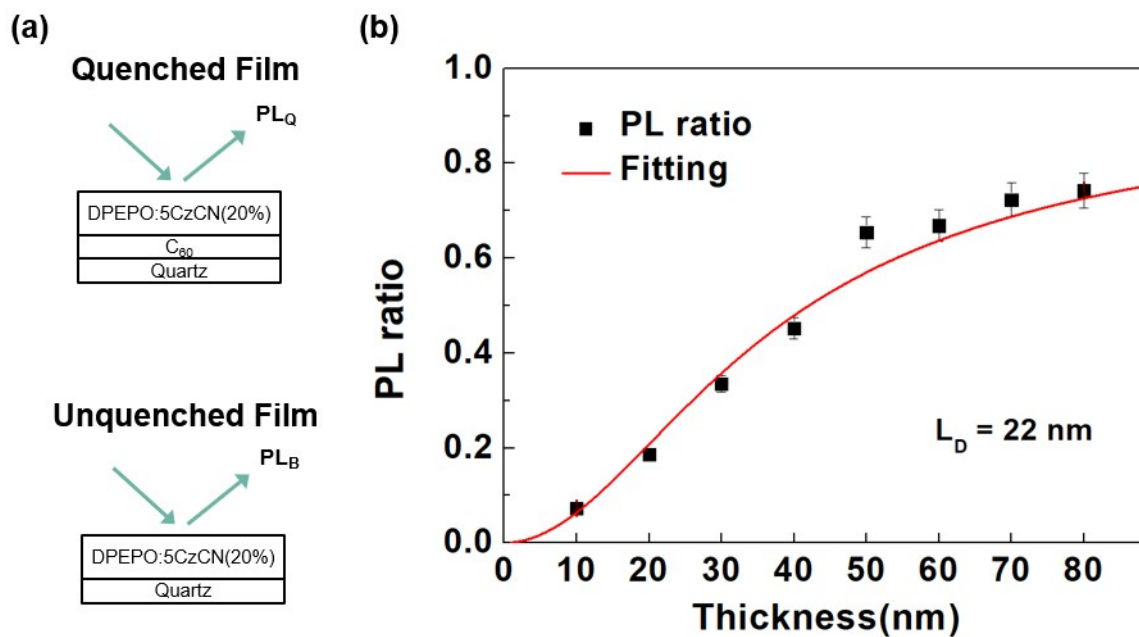

**Figure S2.** (a) Experimental film structure of the thickness dependent PL ratio measurement. (b) PL ratios, corresponding fitting, and the fitted value for  $L_D$  of 5CzCN emitter doped with 20 wt% in DPEPO matrix.

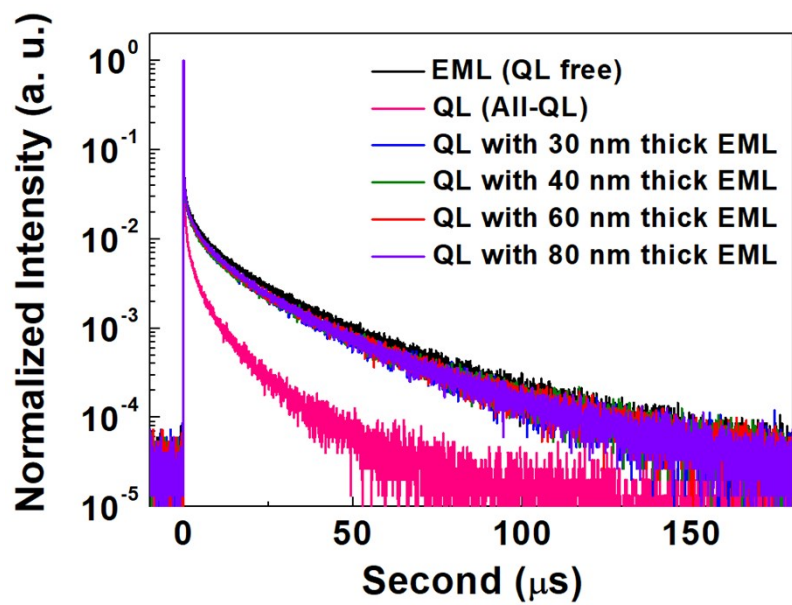

Figure S3. The transient PL decay of all films.

## Supplementary equations for exciton diffusion length (Figure S2)

The exciton diffusion equation could be expressed as<sup>[1-4]</sup>

$$L_D^2 \cdot \frac{\partial^2 n(x)}{\partial x^2} - n(x) + \tau \cdot G = 0 \quad (1)$$

where  $L_D$  is the exciton diffusion length,  $x$  is the distance from the surface in the layer,  $n(x)$  is the exciton density,  $\tau$  is the exciton lifetime and  $G$  is exciton generation rate.

In addition, assuming that a layer of thickness  $d$  has a quenching interface ( $C_{60}$ ), the boundary conditions are

$$n(x = 0) = 0, \quad (2-1)$$

$$\left. \frac{\partial n}{\partial x} \right|_{x=d} = 0, \quad (2-2)$$

$$G(x) = G_0. \quad (2-3)$$

Solving equation 1 with the boundary conditions of equation 2,

$$\frac{PL_Q}{PL_B} (PL \text{ ratio}) = 1 - \frac{L_D}{d} \cdot \frac{1 - \exp\left(\frac{-2d}{L_D}\right)}{1 + \exp\left(\frac{-2d}{L_D}\right)}. \quad (3)$$

## Reference

- [1] L. A. A. Pettersson, L. S. Roman, O. Inganäs, *J. Appl. Phys.* **1999**, 86, 487.
- [2] P. Peumans, A. Yakimov, S. R. Forrest, *J. Appl. Phys.* **2003**, 93, 3693.
- [3] W. A. Luhman, R. J. Holmes, *Adv. Funct. Mater.* **2011**, 21, 764.
- [4] S. M. Menke, R. J. Holmes, *J. Phys. Chem. C* **2016**, 120, 8502.
